# Supplementary material
Source: Research Square preprint supplement (doi:10.21203/rs.3.rs-9109873/v1)
Supplement: Supplementary file 1 [file 6df3b05f57fd4d4c58f72658.docx]

**Supplementary Materials**

**Assessing Concordance Between DeepSeek-V3 and Multidisciplinary Team Treatment Recommendations in Lung Cancer: A Retrospective Diagnostic Study**

**Supplemental Figure 1.**

**Study flowchart of the retrospective evaluation comparing DeepSeek-V3–generated treatment recommendations with original multidisciplinary team (MDT) consensus in lung cancer patients (2025 cohort).**

**
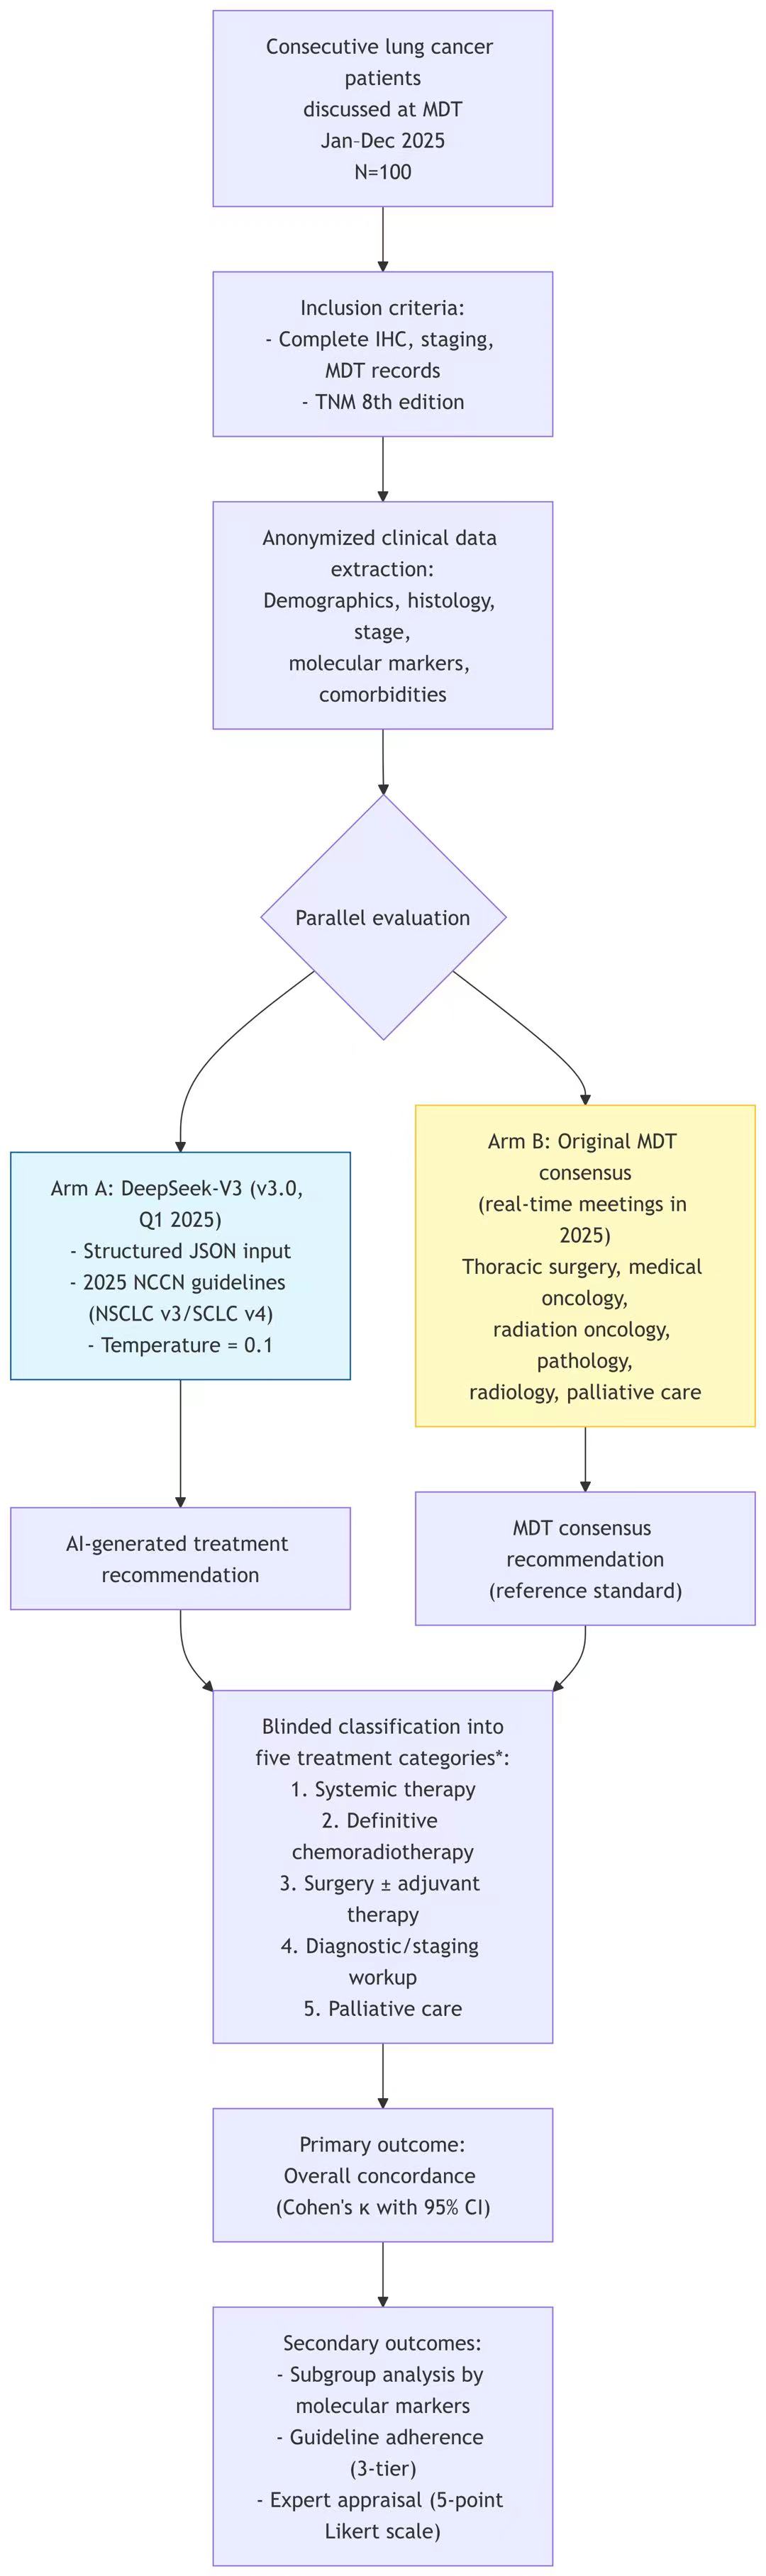
**

**Supplemental Table 1.**

**Individual-level baseline characteristics, immune marker profiles, and detailed treatment recommendations of the lung cancer patient cohort (N=100).**

| **ID** | **Age** | **Sex** | **Diagnosis** | **Stage** | **cTNM** | **Lesion Location** | **ECOG** | **Rec. by MDT** | **Rec. by DeepSeek** | **Immune marker** |
| --- | --- | --- | --- | --- | --- | --- | --- | --- | --- | --- |
| 1 | 54 | M | SCLC | ⅢC | cT4N3aM0 | Left upper lobe | 1 | Chest CT + Immunotherapy+ RTx | TRT + PCI + Immunotherapy | NA |
| 2 | 59 | M | LUSA | ⅢC | cT3N3aM0 | Right lung | 1 | Immunotherapy (Sintilimab) + CTx (Gemcitabine) | Immunotherapy (Sintilimab / Pembrolizumab) | NA |
| 3 | 56 | M | LCLC | ⅢB | cT1N3M0 | Left upper lobe | 1 | EP/EC (Etoposide + Cisplatin + Carboplatin) | CTx+ thoracic RTx | CK(P)(+), Vimentin(-), WT1(-), CK7(-),CK20(-), villin (+)，CDX2(-)，TTF-1(+)，NapsinA(-)，p40(-)，p63(-)，CD56(+)，CgA(+)，Syn(+)，PAX8(-),PSA(-),ALK(-),Rb(-),p53（diffuse strong +)，Ki67(70%+) |
| 4 | 62 | M | LUSA | ⅢB | cT1N3M0 | Right middle lobe | 0 | Surgey +Adj.RCTx | Surgey +Adj.RCTx | Ki-67(50%+)， P63(+)，P40(+) |
| 5 | 69 | M | SCLC | ⅢC | cT4N3M0 | Left lung | 1 | RCTx | RCTx | CD56(+）,CgA(+)，CK7(-), Ki-67(80%+), NapsinaA(-), P40(-), P63（scattered weak +），Syn(+)， TTF-1(+), CK(P)（partial weak+），Vimentin(-), INSM1 (+),NKX2.2(-), Rb(-), P53(-) |

| **ID** | **Age** | **Sex** | **Diagnosis** | **Stage** | **cTNM** | **Lesion Location** | **ECOG** | **Rec. by MDT** | **Rec. by DeepSeek** | **Immune marker** | |
| --- | --- | --- | --- | --- | --- | --- | --- | --- | --- | --- | --- |
| 6 | 76 | F | NSCLC | ⅣB | cT2N3M1c | Right upper lobe | 2 | Immunotherapy+CTx | Immunotherapy+CTx | CK7(-), Ki-67(30%+), NapsinA(),P40（partial+）,P63（partial+）， S0X10(-), TTF-1(-),ALK(-), CK(P) (+), PAX8(-),ER(-), PR(-)，Vimentin（partial+） |
| 7 | 40 | M | LUSA | ⅢA | cT4N1M0 | Right upper lobe | 0 | Surgey +Adj.RCTx | Pembrolizumab + Paclitaxel/ Albumin-bound paclitaxel + Carboplatin | CK7(+)，CK20(-)，Vimentin(+/-)，WT1(-)，TTF-1(-),NapsinA(-)，p40（partial+)，p63（partial+），ALK(-),NUT(-),Ki67(40%+) |
| 8 | 68 | M | LUAD | ⅢA | cT4N0M0 | Right lower lobe | 1 | Surgey +Adj.RCTx | RCTx | NA |
| 9 | 56 | M | LUAD | ⅡA | cT2N2M0 | Right lower lobe | 1 | Surgey +Adj.RCTx | CTx | CK5/6(-), Ki-67(35%+), NapsinA(-), P40(-),P63(-), TTF-1(-), CK7(+), ALK(-),CK(P)(+),INI-1(+), ERG1(-) |
| 10 | 84 | M | LUSA | ⅡA | cT2bN0M0 | Right lower lobe | 2 | RTx | RTx | NA |
| 11 | 63 | F | LUAD | IB | cT2N0M0 | Right lower lobe | 0 | Surgey +Adj.RCTx | Surgey +Adj.RCTx | NA |

| **ID** | **Age** | **Sex** | **Diagnosis** | **Stage** | **cTNM** | **Lesion Location** | **ECOG** | **Rec. by MDT** | **Rec. by DeepSeek** | **Immune marker** |
| --- | --- | --- | --- | --- | --- | --- | --- | --- | --- | --- |
| 12 | 70 | M | LUAD | ⅡA | cT2N0M0 | Left lower lobe | 1 | Neoadjuvant therapy | RCTx | NA |
| 13 | 62 | M | LUSA | ⅣB | cT4N3M1c | Right lung | 2 | Immunotherapy+ CTx | Pembrolizumab monotherapy immunotherapy | P40(+), P63(1)，CK5/6(+), Ki-67(40%),CK7(-), NapsinA(-), TTF-1(-), ALK(-), CD5(-), CD117(-) |
| 14 | 52 | M | LUSA | ⅡB | cT2N1M0 | Right lower lobe | 1 | CTx | RCTx | CK5/6(+), P40(+), P63(+), CK7(-), TTF-1(-), NapsinA(-), Ki-67(50%+)，ALK(-) |
| 15 | 72 | M | LUAD | ⅣA | cT2N1M1 | Left lung | 2 | RCTx | RCTx | NA |
| 16 | 72 | M | LUSA | ⅢB | cT3N2M0 | Left upper lobe | 1 | RCTx | RCTx | Ki-67(70%+) |
| 17 | 72 | M | SCLC | ⅢC | cT4N3M0 | Right upper lobe | 2 | RCTx | Topotecan monotherapy chemotherapy | CK7(-), Ki-67(80%+), NapsinA(-), P40(-)， P63(-)， TTF-1(+),ALK(-),Vimentin(-)，CK(P)（weak+）,CD56(+), CgA(+),Syn(+), INSM1(+) |
| 18 | 58 | F | SCLC | ⅢB | cT2bN3M0 | Left lower lobe | 2 | stop Immunotherapy+ RTx | Topotecan monotherapy chemotherapy | CK(P)（weak+），CD56(+),CgA(+), Syn(+), TTF-1(+), NapsinA(-),CK7(-), Vimentin(-), Ki-67(80%+), P40(-), P63(-), ALK(-), INSM1 (+)，P53（partial+） |

| **ID** | **Age** | **Sex** | **Diagnosis** | **Stage** | **cTNM** | **Lesion Location** | **ECOG** | **Rec. by MDT** | **Rec. by DeepSeek** | **Immune marker** |
| --- | --- | --- | --- | --- | --- | --- | --- | --- | --- | --- |
| 19 | 84 | M | NSCLC | Ⅳ | cT4N2M1 | Left upper lobe | 2 | Pathological evaluation + IHC genetic testing | Targeted immunotherapy | NA |
| 20 | 67 | M | LUAD | ΙA | cT1N0M0 | Right lung | 0 | Surgey +Adj.RCTx | Surgey +Adj.RCTx | NA |
| 21 | 59 | M | LUSA | ⅢA | cT2bN2M0 | Right lower lobe | 1 | Local perfusion chemotherapy | RCTx | PCK (+)、CK5/6(+)、P40(+)、P63(+)、Ki67 (L160%)、P53 (70%+）、CEA(partial+)、CK7(-)、TTF-1(-)，NapsinA(-)、Syn(-）、PAX-8(-)、CATA-3(-) |
| 22 | 64 | F | LUAD | ⅣA | cT4N3M1a | Right upper lobe | 2 | Pemetrexed + Platinum combined+chemotherapy+ Sintilimab,Bevacizumab | Chemotherapy + Bevacizumab | Calretinin(-)， CK(P)(+), CK7(+), CEA (+), Vimentin(-), WT1(-),Ri-67(40%+), TTF-1(+), NapsinA(+)，P40(-), P63(-） |
| 23 | 62 | M | LUAD | ⅡA | cT2N0M0 | Right upper lobe | 0 | Surgey +Adj.RCTx | Platinum-doublet chemotherapy +  Immune checkpoint inhibitor | NA |
| 24 | 57 | M | LUAD | ΙA | cT1N1M0 | Right upper lobe | 0 | Surgey +Adj.RCTx | RCTx | NA |
| 25 | 50 | M | LUAD | ⅣA | T4N3M1b | Right upper lobe | 1 | genetic testing + PD-L1 testing + Immunotherapy | immune checkpoint inhibitor | NA |

| **ID** | **Age** | **Sex** | **Diagnosis** | **Stage** | **cTNM** | **Lesion Location** | **ECOG** | **Rec. by MDT** | **Rec. by DeepSeek** | **Immune marker** |
| --- | --- | --- | --- | --- | --- | --- | --- | --- | --- | --- |
| 26 | 57 | F | SCLC | ⅢB | cT4N2M0 | Left lung | 1 | RCTx | RCTx | NA |
| 27 | 70 | M | LUSA | ⅢB | cT4N2M0 | Right lung | 1 | CTx+ Immunotherapy | RCTx | NA |
| 28 | 75 | M | LUSA | ⅢB | cT4cN2M0 | Right lower lobe | 2 | Salvage therapy+CTx | Salvage therapy (Albumin-bound paclitaxel) | CK5/6(+)，P40(+), P63(+), NapsinA(-),TTF-1(-)，CK7(-), Ki-67(60%+),ALK(-) |
| 29 | 67 | M | LUSA | ⅢC | cT4N2M0 | Left upper lobe | 1 | Immunotherapy+ CTx | RTx | CK5/6(+).P40(+),P63(+), CK7(-), NapsinA(-).TTF-1(-), Ki-67(50%), ALK(-),PD-LI, TPS<1% |
| 30 | 66 | M | LUSA | ⅢB | cT4N2M0 | Right lower lobe | 1 | Surgey +Adj.RCTx | RCTx | CK5/6(+), CX7(-), TTF-1(-), P40(+), Ki-67(60%+), NapsinA(-)，P63(+) |
| 31 | 59 | F | LUAD | ⅢB | cT4N2M0 | Left lower lobe | 1 | Immunotherapy + systemic chemotherapy | Immunotherapy+ CTx | NA |
| 32 | 65 | M | SCLC | ΙA | cT1aN0M0 | Left upper lobe | 0 | Surgey +Adj.RCTx | Surgey +Adj.RCTx | NA |
| 33 | 71 | F | LUAD | ⅣB | cT2aN3M1c | Right upper lobe | 2 | Right renal lesion biopsy | Right renal lesion biopsy | CK7(+)，TTF1(+)，NapsinA(+) |

| **ID** | **Age** | **Sex** | **Diagnosis** | **Stage** | **cTNM** | **Lesion Location** | **ECOG** | **Rec. by MDT** | **Rec. by DeepSeek** | **Immune marker** |
| --- | --- | --- | --- | --- | --- | --- | --- | --- | --- | --- |
| 34 | 63 | F | LUAD | ⅢC | cT4N3M0 | Right upper lobe | 1 | RCTx | RCTx | CK7(+), TTF-1(+), NapsinA (+), CK5/6(-), P40(-), P63(-), Ki-67(20%+), ALK(-) |
| 35 | 69 | M | LUSA | ⅡA | cT2N0M0 | Left lung | 0 | ronchial arterial embolization + tumor perfusion chemotherapy | Surgey +Adj.RCTx | CK7(-), Ki-67(80%+), NapsinA(-), P40(+), P63(+), TTF-1(-),ALK(-) |
| 36 | 57 | M | LUSA | ⅡB | CT3N0M0 | Left lower lobe | 1 | Surgey +Adj.RCTx | Immunotherapy+ CTx(systemic treatment) | Ki-67(40%+),P63(+), P40(+), TTF-1(-), CK7(-), ALK(-), Napsina(-) |
| 37 | 58 | M | SCLC | ⅣA | cT4N2M1b | Right lung | 2 | EP regimen chemotherapy + Immunotherapy  (Serplulimab/Tislelizumab) | Immunotherapy+ CTx （Etoposide + Carboplatin + Atezolizumab） | CD56(+),CgA(+)，CK(P)(+)，Ki67(70%+)，LCA(-)，NKX2.2(+)，p53（-)，Rb(+/-)，S0X2(+),SSTR2(-)，Syn(+)，TTF-1(+), Vimentin(-) |
| 38 | 63 | M | LUSA | ⅢB | cT4N2M0 | Right lung | 2 | Anti-infection + Hormonal therapy | Manage radiation pneumonitis | TTF-1(-),NapsinA(-),p40(+), ALK(-),Ki67(50%+) |
| 39 | 61 | M | LUSA | Ⅳ | cT4N2M1 | Right lower lobe+Left lung | 2 | RCTx | CTx + immune checkpoint inhibitor | Ki-87(60%+)，CK7(+), TTF-1(-)，P40(+), NapsinA(-), ALK(-), CK5/6(+), P63(+) |
| 40 | 73 | M | LUSA | ⅡA | cT2N0M0 | Left upper lobe | 1 | RCTx | RTx | CK7（+)，Ki-67(60%+), NapsinA (-), P40(+), P63(+), S0X10(-), TTF-1(-), ALK(-), CK(P)(+) |

| **ID** | **Age** | **Sex** | **Diagnosis** | **Stage** | **cTNM** | **Lesion Location** | **ECOG** | **Rec. by MDT** | **Rec. by DeepSeek** | **Immune marker** |
| --- | --- | --- | --- | --- | --- | --- | --- | --- | --- | --- |
| 41 | 63 | M | LUSA | Ⅳ | cT4N3M1 | Right upper lobe | 2 | Chemotherapy +targeted drug therapy+ PET-CT | Immunotherapy+ CTx | TTF-1(+), NapsinA(+), CK5/6(-), CK7(+), P40(-)，P63(-), Ki-67(5%), ALK(-) |
| 42 | 74 | M | LUSA | ⅢB | cT2N3M0 | Left lower lobe | 1 | neck examination, bronchial arterial  interventional embolization +CTx | RCTx | NA |
| 43 | 70 | F | LUAD | ⅣA | cT4N3M1a | Bilateral | 2 | Genetic testing + Denosumab therapy  (Immunotherapy (Bevacizumab) + CTx | Biomarker testing +targeted therapy | NA |
| 44 | 50 | M | LUSA | ⅢB | cT4N2M0 | Left upper lobe | 1 | CTx + immunotherapy + local palliative RTx | RTx | NA |
| 45 | 77 | M | LUAD | ⅣA | cT4N3M1a | Left lower lobe | 2 | CTx + immunotherapy （Amivantamab） | Platinum-based Immunotherapy+ CTx | NA |
| 46 | 68 | M | LUSA | Ⅳ | cT4N0M1 | Right lower lobe | 2 | Conservative treatment | Immunotherapy+ CTx（PD-L1 testing） | NA |
| 47 | 67 | M | LUSA | ⅢA | cT2N2M0 | Left lower lobe | 1 | Systemic therapy (CTx) | RCTx | NA |

| **ID** | **Age** | **Sex** | **Diagnosis** | **Stage** | **cTNM** | **Lesion Location** | **ECOG** | **Rec. by MDT** | **Rec. by DeepSeek** | **Immune marker** |
| --- | --- | --- | --- | --- | --- | --- | --- | --- | --- | --- |
| 48 | 47 | M | LUAD | ⅢA | cT1N2M0 | Left upper lobe | 0 | Surgey +Adj.RCTx | Surgey +Adj.RCTx | CK5/6(-)，CK7(+), TTF-1(+), P40(-),ALK(-), Ki-67(20%+), NapsinA(+)。 |
| 49 | 46 | F | LUAD | ⅡA | cT2N0M0 | Right lower lobe | 0 | Surgey +Adj.RCTx | Surgey +Adj.RCTx | TTF-1(+), NapsinA (+), Ki-67(20%), CK5/6(-)，CK7(+), P40(-), P63(-),ALK(-) |
| 50 | 66 | M | LUAD | ⅣB | cT2N3M1c | Right lung | 2 | PET-CT examination / Targeted therapy | FOLFOX / XELOX | CK(P)(+)，Vimentin(-)，WT1(-)，CK7(+)，CK20（partial+），Villin(+)，CDX2(+)，TTF-1(-)，NapsinA(-)，PAX8(-)，PSA(-)，GATA3(-)，Ki67(30%+) |
| 51 | 62 | M | LUSA | ⅢA | cT2N2M0 | Left lower lobe | 1 | Surgey +Adj.RCTx | RCTx | NA |
| 52 | 59 | M | LUSA | ⅢA | cT2N2M0 | Right lower lobe | 1 | Immunotherapy +CTx | RCTx | PCK (+)、CK5/6 (+)、P40(+)、P63(+)、Ki67 (L160%)、P53(70%+)、CEA（partial+）、CK7(-)、TTF-1(-)，NapsinA (-)、Syn (-)、PAX-8 (-)、GATA-3 (-) |
| 53 | 75 | M | LUSA | ⅢA | cT1N2M0 | Right upper lobe | 0 | Surgey +Adj.RCTx | Surgey +Adj.RCTx | NA |
| 54 | 69 | M | LUAD | ⅣA | cT3N0M1a | Right lung | 2 | Genetic testing+immunotherapy | Genetic testing + targeted therapy | NA |

| **ID** | **Age** | **Sex** | **Diagnosis** | **Stage** | **cTNM** | **Lesion Location** | **ECOG** | **Rec. by MDT** | **Rec. by DeepSeek** | **Immune marker** |
| --- | --- | --- | --- | --- | --- | --- | --- | --- | --- | --- |
| 55 | 63 | M | LUAD | Ⅳ | cT4N3M1c | Right lung | 2 | horacoscopic biopsy + genetic testing | MET biopsy genetic testing, targeted therapy | CK(P)(+), Vimentin(-), TTF-1(+), NapsinA(+), CK7(+),CEA(+)，Ki-67(20%+), CK5/6(-), P40(-),P63（focal+）, ALR(-), WT1(-),Calretinin(-) |
| 56 | 63 | M | LUSA | IB | cT3N0M0 | Right upper lobe | 0 | Surgey +Adj.RCTx | Surgey +Adj.RCTx | NA |
| 57 | 68 | M | SCLC | Ⅳ | cT4N3M0 | Right lung | 2 | second-line therapy (Irinotecan /  Albumin-bound Paclitaxel alone) | Second-line chemotherapy (Topotecan or Irinotecan) | NA |
| 58 | 69 | M | LUSA | ⅢB | cT2N2M0 | Right upper lobe | 1 | Immunotherapy +CTx | RCTx | P63(+), P40(+), Ki-67(15%+), TTF-1(-),  NapsinA(-) |
| 59 | 63 | F | LUAD | Ⅳ | cT4N3M1 | Right lower lobe | 3 | lumbar puncture, CSF examination,  add Depakine + Carbamazepin | Continue oral Osimertinib, | NA |
| 60 | 68 | M | LUSA | ⅢB | cT1N3M0 | Left lower lobe | 2 | RCTx | RCTx | NA |
| 61 | 69 | M | LUAD | ⅣB | cT4N2M1c | Left lung | 2 | CTx(Taxanes) + Anti-angiogenic agent Ivonescimab | Platinum-based CTx ± Bevacizumab | NA |

| **ID** | **Age** | **Sex** | **Diagnosis** | **Stage** | **cTNM** | **Lesion Location** | **ECOG** | **Rec. by MDT** | **Rec. by DeepSeek** | **Immune marker** |
| --- | --- | --- | --- | --- | --- | --- | --- | --- | --- | --- |
| 62 | 61 | F | NSCLC | ⅣA | cT2bN3M1b | Right lung | 2 | Manage brain metastases+RCTx+immunotherapy | PD-L1 testing + Immunotherapy+ CTx | NA |
| 63 | 69 | M | LUSA | IIIA | cT2N2M0 | Right upper lobe | 1 | Immunotherapy + systemic CTx + genetic testing | RCTx | Ki-67(60%+) |
| 64 | 64 | M | LUSA | ⅡA | CT2N0M0 | Left lower lobe | 0 | Surgey +Adj. RTx | Surgey +Adj.RCTx | TTF-1(-)， NapsinA(-)， p40(-), NUT(-), ALK(-), HER2(0),SOX2(+),Ki67（about 45%+) |
| 65 | 50 | F | LUSA | ⅢB | CT3N2M0 | Right upper lobe | 1 | RCTx | RCTx | NapsinA(-）,Ki-67(70%+), CK7(-)， TTF-1(-)，P63(+),P40(+), ALK(-) |
| 66 | 72 | M | SCLC | Ⅳ | cT4N3M1a | Right upper lobe | 3 | RTx | systemic treatment | CK7(-), Ki-67(80%+), NapsinA(-), P40(-)， P63(-)， TTF-1(+), ALK(-), Vimentin(-)，CK(P)（weak+）,CD56(+), CgA(+),Syn(+), INSM1(+) |
| 67 | 80 | F | LUSA | ⅢA | cT1N2M0 | Left lower lobe | 2 | RTx+Oral chemotherapy drug | RCTx | NA |

| **ID** | **Age** | **Sex** | **Diagnosis** | **Stage** | **cTNM** | **Lesion Location** | **ECOG** | **Rec. by MDT** | **Rec. by DeepSeek** | **Immune marker** |
| --- | --- | --- | --- | --- | --- | --- | --- | --- | --- | --- |
| 68 | 64 | F | LUSA | ⅢB | cT2bN2M0 | Left lower lobe | 1 | Surgey +Adj.RCTx | RCTx | P40(+), P63(+), CK5/6(+), CK（partial+）,NapsinA(-),TTF-1(-),ALK(-),HER-2(0)，Ki-67(70%+) |
| 69 | 52 | M | NSCLC | ⅣB | cT4N0M1c | Left lung | 2 | Systemic CTx+ genetic testing | Pembrolizumab (Atezolizumab /  Toripalimab)+ platinum-double CTx | CK5/6(-)，CK7(-)， D2-40(-),Ki-67(70%+),NapsinA(-)，TTF-1(-),WT1(-),  Calretinin(-),HDNE-1(-),CK(P)(partial+)Vimentin(+),CD3(-), CD20(-)，BRG1(+),INI-1(-)、CD34(-),S100（focal+），S0X10(-), TLE1(-), FLI-1(-), CD99(-), SALL4（scattered+)，H3K27me3(+),SM（partial+），Syn(-) |
| 70 | 56 | M | LUSA | ⅣA | cT4N1M1a | Left lung | 2 | PD-L1 testing + Immunotherapy+CTx | Immunotherapy+ CTx(systemic treatment) | TTF-1(-)，NapsinA(-)，p40(+)，NUT(-)ALK(-),HER2(0),Ki67(80%+) |
| 71 | 68 | F | LUAD | ⅣA | cT2bN0M1b | Left upper lobe | 2 | CTx | Targeted therapy guided by re-biopsy | NA |
| 72 | 53 | M | LUAD | IVB | cT1N1M1b | Left lung | 2 | Anticoagulation therapy, switch targeted drug | anticoagulation, switch to 3rd generation | TTF-1(SPT24)(+),NapsinA(+), ALK(-),NKX3.1(-), CDX2(-) |

| **ID** | **Age** | **Sex** | **Diagnosis** | **Stage** | **cTNM** | **Lesion Location** | **ECOG** | **Rec. by MDT** | **Rec. by DeepSeek** | **Immune marker** |
| --- | --- | --- | --- | --- | --- | --- | --- | --- | --- | --- |
| 73 | 77 | F | LUAD | ⅣA | cT4N0M1a | Right lower lobe | 2 | Conservative treatment+genetic testing +antitumor therapy | Biomarker-guided systemic therapy | CK7(+),NapsinA(+),TTF-1(+), P40(-), ALK(-),HER-2(2+), Bi-67(5%+) |
| 74 | 59 | M | LUSA | IIIB | cT3N3M0 | Left upper lobe | 1 | 3 cycles neoadjuvant therapy+ surgery | RCTx | CK5/6(+)，P40(+), P63(+),，CR7(-), NapsinA(-),TTF-1(-), Ki-67(40%), ALR(-), NUT(-) |
| 75 | 63 | F | LUAD | ⅢB | cT1N3M0 | Right upper lobe | 1 | Genetic testing for targeted therapy | Genetic testing for targeted therapy | CK7(+)，CK20(-),Villin(-),Vimentin(+),  WT1(-),PAX8(-),GATA-3(-),TTF-1(+),NapsinA(+)， p16（scattered+），p53（scattered weak+），p63（scattered+），CDX2(-)，ER(C-)，PR(-)、HER-2(0),Ki-67(12%+) |
| 76 | 58 | F | LUAD | Ⅳ | cT4N2M1 | Right upper lobe | 1 | Genetic testing for targeted therapy | Molecular testing and PD-L1 IHC, Immunotherapy | NA |
| 77 | 71 | M | NSCLC | ⅢB | cT4N2M0 | Right upper lobe | 2 | CTx+ Immunotherapy | RCTx | CK5/（partial+),Ki-67(60%+), NapsinA(-),P40(-),P63(-),TTF-1(-),CK7(+),ALK(-), S100(-), SIL(-)S0X10(-),Vinenti(-),Calponin(-), CD117(-) |

| **ID** | **Age** | **Sex** | **Diagnosis** | **Stage** | **cTNM** | **Lesion Location** | **ECOG** | **Rec. by MDT** | **Rec. by DeepSeek** | **Immune marker** |
| --- | --- | --- | --- | --- | --- | --- | --- | --- | --- | --- |
| 78 | 63 | F | NSCLC | ⅢB | cT4N2M0 | Right upper lobe | 1 | Anti-infection + systemic therapy | Anti-infection + systemic therapy  with immune checkpoint inhibitor | CK7(+), TTF-1(-), NapsinA (-), P63(+), P40(+), CD117(-), CK5/6(+), S0X10(-),  S100(-), SMA(-), Calponin(-),Vimentin(-), DOG1(-)，ALK(-), HER-2(0), Ki-67(1%+) |
| 79 | 63 | M | NSCLC | ⅣB | cT4N3M1c | Left lung | 1 | EP regimen CTx (Albumin-bound Paclitaxel  + Carboplatin)+immunotherapy | Etoposide/Irinotecan + Platinum (Cisplatin/Carboplatin) + PD-L1 inhibitor | CD56(-)，CgA(-), CR(P)(+),  Ki-67(40%+), NapsinAK-), P40(+), P63(+),  Sm(-)，TTF-1(-), ALK(-), HER-2(0), P53 （strong+），CK7(-), S100(-), Vimentin(-), CK5/6(+) |
| 80 | 70 | M | LUAD | Ⅳ | cT1N2M1 | Left lung | 2 | Genetic testing +, Anti-tuberculosis treatment | Genetic testing + Anti-tuberculosis treatment | CK(P)(+), Vimentin（partial+）, Ki-67(20%+),CK7(-),D2-40(-), TTF1(+),NapsinA(+)P40(-),Calretinin(-), HBME-1(-),INI-1(+),  P16（focal+）, P53（scattered weak+） |
| 81 | 55 | F | LUAD | ⅢB | cT1bN3M0 | Left lower lobe | 3 | Genetic testing for targeted therapy | Genetic testing for targeted therapy | CK7(+),P63(-)，P40(-), TTF-1(+), NapsinA(+), ALK(+), HER-2(O), P53 （scattered strong+），Ki-67(10%+) |

| **ID** | **Age** | **Sex** | **Diagnosis** | **Stage** | **cTNM** | **Lesion Location** | **ECOG** | **Rec. by MDT** | **Rec. by DeepSeek** | **Immune marker** |
| --- | --- | --- | --- | --- | --- | --- | --- | --- | --- | --- |
| 82 | 80 | M | NSCLC | ⅣA | cT4N3M1c | Right upper lobe | 2 | Genetic testing for targeted therapy | Alectinib monotherapy | CD56(-), CgA(-), CK(P)(-), H（-）,Ki-67(80%),P40(-),P53(-), Rb(+), Syn(-), TTF-1(-), NapsinA (-）, P63(-), INSM1(-), INI-1(+),BRG1(+), HER-2(0),CR7(-), CE8(-), EMA（weak+), CAM5.2(-)， Vimentin(+), ALK(+) |
| 83 | 69 | M | LUSA | Ⅳ | cT1N0M1 | Left lung | 1 | Surgey +Adj.RCTx | Systemic therapy (Pembrolizumab + Carboplatin +  Albumin-bound Paclitaxel)+ surgery | CK(P)(+),P40(+), P63(+), CD5(-), CD117(-),  Ki-67(80%+), NUT(-), P16(-) |
| 84 | 70 | M | NSCLC | ⅢB | cT4N2M0 | Right lung | 2 | Surgey +Adj.RCTx | Surgey +Adj.RCTx | NA |
| 85 | 78 | M | NSCLC | ⅢB | cT4N2M0 | Left lung | 1 | Genetic testing | Genetic testing | NA |
| 86 | 64 | M | LUSA | ⅢB | cT2bN2M0 | Right upper lobe | 2 | Immunotherapy+CTx+Surgery | RCTx | NA |
| 87 | 57 | F | SCLC | ⅢB | cT4N2M0 | Left upper lobe | 1 | RCTx+ brain MRI | RTx | Ki-67（90%+） |

| **ID** | **Age** | **Sex** | **Diagnosis** | **Stage** | **cTNM** | **Lesion Location** | **ECOG** | **Rec. by MDT** | **Rec. by DeepSeek** | **Immune marker** |
| --- | --- | --- | --- | --- | --- | --- | --- | --- | --- | --- |
| 88 | 70 | M | LUSA | ⅡA | cT2N0M0 | Right upper lobe | 1 | Surgey +Adj.RCTx | Surgey +Adj.RCTx | CK(P)(+), Ki-67(50%+), NapsinA(-),  P40(+),P63(+), TTF-1（partial weak+), ALK(-), HER-2(0) |
| 89 | 58 | M | NSCLC | ⅢB | cT4N2M0 | Right lung | 0 | Surgey +Adj.RCTx | Surgey +Adj.RCTx | NA |
| 90 | 60 | M | LUSA | ⅢB | cT4N2M0 | Right lung | 2 | Anti infection+hormone therapy | Manage radiation pneumonitis | TTF-1(-),NapsinA(-),p40(+), ALK(-),Ki67(50%+) |
| 91 | 68 | F | LUSA | IB | CT2N0M0 | Left lower lobe | 1 | Surgey +Adj.RCTx | Surgey +Adj.RCTx | TTF-1(-)， NapsinA(-)， p40(-), NUT(-), ALK(-), HER2(0)， SOX2(+),Ki67（about 45%+) |
| 92 | 67 | M | LUSA | ⅢB | cT1N2M0 | Right upper lobe | 1 | CTx | RCTx | P63(+), P40(+), Ki-67(15%+), TTF-1(-),  NapsinA(-) |
| 93 | 74 | F | LUAD | ⅣA | cT4N3M1 | Left lower lobe | 2 | Immunotherapy（Amivantamab）+ CTx | Platinum-based Immunotherapy+ CTx | NA |
| 94 | 69 | M | LUAD | Ⅳ | cT4N3M1c | Right lung | 2 | thoracoscopic biopsy+genetic testing | MET biopsy genetic testing+ targeted therapy | CK(P)(+), Vimentin(-), TTF-1(+), NapsinA(+), CK7(+),CEA(+)，Ki-67(20%+), CK5/6(-), P40(-),P63（focal+）, ALR(-), WT1(-),Calretinin(-) |

| **ID** | **Age** | **Sex** | **Diagnosis** | **Stage** | **cTNM** | **Lesion Location** | **ECOG** | **Rec. by MDT** | **Rec. by DeepSeek** | **Immune marker** | |
| --- | --- | --- | --- | --- | --- | --- | --- | --- | --- | --- | --- |
| 95 | 55 | M | LUAD | IB | cT2N0M0 | Right lower lobe | 0 | Surgey +Adj.RCTx | Surgey +Adj.RCTx | NA | |
| 96 | 62 | M | LUSA | ⅢA | cT2N3M0 | Left lower lobe | 1 | CTx | RCTx | NA | |
| 97 | 82 | F | LUSA | ⅢB | cT2N3M0 | Left lower lobe | 2 | CTx | RCTx | NA | |
| 98 | 66 | F | LUSA | ⅢB | cT1N3M0 | Right middle lobe | 1 | Surgey +Adj.RCTx | Surgey +Adj.RCTx | Ki-67(50%+)， P63(+)，P40(+) | |
| 99 | 50 | M | LUAD | ⅢA | cT1N2M0 | Left upper lobe | 0 | Surgey +Adj.RCTx | Surgey +Adj.RCTx | CK5/6(-)，CK7(+), TTF-1(+), P40(-),ALK(-), Ki-67(20%+), NapsinA(+) | |
| 100 | 78 | F | LUAD | ⅢC | cT4N3M0 | Right upper lobe | 2 | RCTx | RCTx | CK7(+), TTF-1(+), NapsinA (+), CK5/6(-), P40(-), P63(-), Ki-67(20%+), ALK(-) | |
| **Note:** This table consolidates patient data from multiple source files;M,Male; F, Female; "NA" ,not available;Adj, adjuvant ; RCTx, radiochemotherapy ; CTx, chemotherapy ; RTx, radiotherapy ; Immunomarker results are presented as reported in the source, with (+) for positive, (-) for negative, and descriptive terms like "focal", "weak", "strong" where specified ; Rec. by MDT and Rec. by DeepSeek columns show the treatment recommendations from the multidisciplinary team and the AI model, respectively. | | | | | | | | | | |

**Supplemental Table 2.**

**Individual-level treatment recommendation categorization for MDT and DeepSeek-V3 (N=100).**

| **Patient_ID** | **MDT Recommdation** | **DeepSeek Recommdation** |
| --- | --- | --- |
| 1 | Systemic Therapy | Systemic Therapy |
| 2 | Systemic Therapy | Systemic Therapy |
| 3 | Definitive Chemoradiotherapy | Definitive Chemoradiotherapy |
| 4 | Surgery ± Adjuvant Therapy | Surgery ± Adjuvant Therapy |
| 5 | Definitive Chemoradiotherapy | Definitive Chemoradiotherapy |
| 6 | Systemic Therapy | Systemic Therapy |
| 7 | Surgery ± Adjuvant Therapy | Systemic Therapy |
| 8 | Definitive Chemoradiotherapy | Definitive Chemoradiotherapy |
| 9 | Systemic Therapy | Systemic Therapy |
| 10 | Definitive Chemoradiotherapy | Definitive Chemoradiotherapy |
| 11 | Surgery ± Adjuvant Therapy | Surgery ± Adjuvant Therapy |
| 12 | Systemic Therapy | Definitive Chemoradiotherapy |
| 13 | Systemic Therapy | Systemic Therapy |
| 14 | Definitive Chemoradiotherapy | Definitive Chemoradiotherapy |
| 15 | Definitive Chemoradiotherapy | Definitive Chemoradiotherapy |
| 16 | Systemic Therapy | Systemic Therapy |
| 17 | Definitive Chemoradiotherapy | Definitive Chemoradiotherapy |
| 18 | Definitive Chemoradiotherapy | Definitive Chemoradiotherapy |
| 19 | Diagnostic/Staging Workup | Systemic Therapy |
| 20 | Surgery ± Adjuvant Therapy | Surgery ± Adjuvant Therapy |
| 21 | Definitive Chemoradiotherapy | Definitive Chemoradiotherapy |
| 22 | Systemic Therapy | Systemic Therapy |
| 23 | Surgery ± Adjuvant Therapy | Systemic Therapy |
| 24 | Surgery ± Adjuvant Therapy | Systemic Therapy |
| 25 | Systemic Therapy | Systemic Therapy |
| 26 | Definitive Chemoradiotherapy | Definitive Chemoradiotherapy |
| 27 | Systemic Therapy | Systemic Therapy |

**Table 2 continued.**

| **Patient_ID** | **MDT Recommdation** | **DeepSeek Recommdation** |
| --- | --- | --- |

| 28 | Palliative Care | Palliative Care |
| --- | --- | --- |
| 29 | Systemic Therapy | Definitive Chemoradiotherapy |
| 30 | Systemic Therapy | Systemic Therapy |
| 31 | Systemic Therapy | Systemic Therapy |
| 32 | Surgery ± Adjuvant Therapy | Surgery ± Adjuvant Therapy |
| 33 | Diagnostic/Staging Workup | Diagnostic/Staging Workup |
| 34 | Definitive Chemoradiotherapy | Definitive Chemoradiotherapy |
| 35 | Systemic Therapy | Surgery ± Adjuvant Therapy |
| 36 | Surgery ± Adjuvant Therapy | Systemic Therapy |
| 37 | Systemic Therapy | Systemic Therapy |
| 38 | Palliative Care | Palliative Care |
| 39 | Systemic Therapy | Systemic Therapy |
| 40 | Definitive Chemoradiotherapy | Definitive Chemoradiotherapy |
| 41 | Systemic Therapy | Systemic Therapy |
| 42 | Definitive Chemoradiotherapy | Definitive Chemoradiotherapy |
| 43 | Systemic Therapy | Systemic Therapy |
| 44 | Systemic Therapy | Systemic Therapy |
| 45 | Systemic Therapy | Systemic Therapy |
| 46 | Palliative Care | Systemic Therapy |
| 47 | Systemic Therapy | Systemic Therapy |
| 48 | Surgery ± Adjuvant Therapy | Surgery ± Adjuvant Therapy |
| 49 | Surgery ± Adjuvant Therapy | Surgery ± Adjuvant Therapy |
| 50 | Diagnostic/Staging Workup | Definitive Chemoradiotherapy |
| 51 | Definitive Chemoradiotherapy | Definitive Chemoradiotherapy |
| 52 | Systemic Therapy | Systemic Therapy |
| 53 | Surgery ± Adjuvant Therapy | Surgery ± Adjuvant Therapy |
| 54 | Systemic Therapy | Systemic Therapy |
| 55 | Diagnostic/Staging Workup | Diagnostic/Staging Workup |
| 56 | Surgery ± Adjuvant Therapy | Surgery ± Adjuvant Therapy |
| 57 | Definitive Chemoradiotherapy | Definitive Chemoradiotherapy |
| 58 | Definitive Chemoradiotherapy | Definitive Chemoradiotherapy |
| 59 | Diagnostic/Staging Workup | Palliative Care |
| 60 | Definitive Chemoradiotherapy | Definitive Chemoradiotherapy |
| 61 | Systemic Therapy | Systemic Therapy |
| 62 | Systemic Therapy | Systemic Therapy |
| 63 | Systemic Therapy | Systemic Therapy |
| 64 | Surgery ± Adjuvant Therapy | Surgery ± Adjuvant Therapy |
| 65 | Systemic Therapy | Systemic Therapy |
| 66 | Palliative Care | Palliative Care |
| 67 | Definitive Chemoradiotherapy | Definitive Chemoradiotherapy |

**Table 2 continued.**

| **Patient_ID** | **MDT Recommdation** | **DeepSeek Recommdation** |
| --- | --- | --- |

| 68 | Diagnostic/Staging Workup | Systemic Therapy |
| --- | --- | --- |
| 69 | Definitive Chemoradiotherapy | Systemic Therapy |
| 70 | Systemic Therapy | Systemic Therapy |
| 71 | Definitive Chemoradiotherapy | Systemic Therapy |
| 72 | Systemic Therapy | Systemic Therapy |
| 73 | Systemic Therapy | Systemic Therapy |
| 74 | Systemic Therapy | Systemic Therapy |
| 75 | Systemic Therapy | Systemic Therapy |
| 76 | Systemic Therapy | Systemic Therapy |
| 77 | Systemic Therapy | Systemic Therapy |
| 78 | Systemic Therapy | Systemic Therapy |
| 79 | Systemic Therapy | Systemic Therapy |
| 80 | Diagnostic/Staging Workup | Diagnostic/Staging Workup |
| 81 | Systemic Therapy | Systemic Therapy |
| 82 | Diagnostic/Staging Workup | Systemic Therapy |
| 83 | Surgery ± Adjuvant Therapy | Surgery ± Adjuvant Therapy |
| 84 | Surgery ± Adjuvant Therapy | Surgery ± Adjuvant Therapy |
| 85 | Diagnostic/Staging Workup | Diagnostic/Staging Workup |
| 86 | Systemic Therapy | Systemic Therapy |
| 87 | Definitive Chemoradiotherapy | Definitive Chemoradiotherapy |
| 88 | Surgery ± Adjuvant Therapy | Surgery ± Adjuvant Therapy |
| 89 | Surgery ± Adjuvant Therapy | Surgery ± Adjuvant Therapy |
| 90 | Palliative Care | Palliative Care |
| 91 | Surgery ± Adjuvant Therapy | Surgery ± Adjuvant Therapy |
| 92 | Definitive Chemoradiotherapy | Definitive Chemoradiotherapy |
| 93 | Systemic Therapy | Systemic Therapy |
| 94 | Diagnostic/Staging Workup | Diagnostic/Staging Workup |
| 95 | Surgery ± Adjuvant Therapy | Surgery ± Adjuvant Therapy |
| 96 | Definitive Chemoradiotherapy | Definitive Chemoradiotherapy |
| 97 | Definitive Chemoradiotherapy | Definitive Chemoradiotherapy |
| 98 | Surgery ± Adjuvant Therapy | Surgery ± Adjuvant Therapy |
| 99 | Surgery ± Adjuvant Therapy | Surgery ± Adjuvant Therapy |
| 100 | Definitive Chemoradiotherapy | Definitive Chemoradiotherapy |
